# Supplementary material
Source: Elsevier journal article supplement (https://www.sciencedirect.com/science/article/pii/S0014256515000089)
Supplement: mmc1 [file S0014256515000089:mmc1.docx]

***Respuesta Correcta: Metástasis de un tumor primario no cutáneo (“Nódulo de la hermana María José”).***

El paciente fue diagnosticado de metástasis cutánea falleciendo al mes y medio de su visita inicial. “El nódulo de la hermana María José” representa una metástasis cutánea umbilical. Es importante su reconocimiento, ya que puede ser el primer signo de una neoplasia intraabdominal (sobre todo tumores del aparato digestivo y ginecológicos) en un paciente aparentemente sano. Aunque suele asociarse a neoplasias diseminadas, a veces permite el diagnóstico y el tratamiento precoz del tumor primario, aumentando así la supervivencia del paciente.
